# Supplementary material for: Life cycle, host specificity and potential impact of a gall-inducing thrips Acaciothrips ebneri, a biological control agent for prickly acacia (Vachellia nilotica subsp. indica) in Australia
Source: Springer Nature journal article supplement (doi:10.1007/s10526-024-10269-y), 2024-07-23
Supplement: MOESM1 [file 10526_2024_10269_MOESM1_ESM.docx]

Supplementary Table S1 The indices and parameters used in the development of the CLIMEX model for *Acaciothrips ebneri* based on its native range distribution

| **Index** | **CLIMEX parameters** | **Value** |
| --- | --- | --- |
| Temperature | Limiting low temperature (DV0) | 18 oC |
|  | Lower optimal temperature (DV1) | 25 oC |
|  | Upper optimal temperature (DV2) | 37 oC |
|  | Limiting high temperature (DV3) | 45 oC |
| Moisture | Limiting low moisture (SM0) | 0.045 a |
|  | Lower optimal moisture (SM1) | 0.2 a |
|  | Upper optimal moisture (SM2) | 1.2 a |
|  | Limiting high moisture (SM3) | 1.5 a |
| Cold stress | Cold stress temperature threshold(TTCS) | 2.5 oC |
|  | Cold stress temperature rate (THCS) | -0.2 week-1 |
|  | Cold stress degree-day threshold DTCS) | 0 oC days |
|  | Cold-stress degree-day rate (DHCS) | 0 week-1 |
| Heat stress | Heat stress temperature threshold (TTHS) 45 oC | |
|  | Heat stress temperature rate (THHS) | 0.05 week-1 |
|  | Heat stress degree-day threshold | 0 oC days |
|  | Heat-stress degree-day rate | 0 week-1 |
| Dry stress | Dry stress threshold (SMDS) | 0.045 a |
|  | Dry stress rate (HDS) | -0.025 week-1 |
| Wet stress | Wet stress threshold (SMWS) | 1.5 a |
|  | Wet stress rate (HWS) | 0.02 week-1 |

a Values without units are a dimensionless proportion.
